# Supplementary material for: The Clinical Efficacy of Multidose Oritavancin: A Systematic Review
Source: MDPI journal article supplement (doi:10.3390/antibiotics12101498), 2023-09-29
Supplement: s1 [file s1]

**Table S1.** Included Articles

| First Author et al. (Year)            | Country of Origin | Type of Study                     | N. of Patients with ORI multidose regimen on total ORI treatment |
|---------------------------------------|-------------------|-----------------------------------|------------------------------------------------------------------|
| Stewart, Cassie L et al. 2017 [24]    | USA               | retrospective chart review        | 10/10                                                            |
| Delaportas, Dino J et al. 2017 [25]   | USA               | case report                       | 1/1                                                              |
| Schulz, Lucas T et al. 2018 [26]      | USA               | retrospective cohort study        | 17/44                                                            |
| Foster, Rachel A et al. 2018 [27]     | USA               | case report                       | 1/1                                                              |
| Ruggero, Michael A et al. 2018 [28]   | USA               | case report                       | 1/1                                                              |
| Antony, Suresh J et al. 2017 [29]     | USA               | case report                       | 2/2                                                              |
| Nguyen, Jullian P et al. 2020 [30]    | USA               | case report                       | 1/1                                                              |
| Ahiskali, Aileen et al. 2020 [31]     | USA               | case series                       | 11/24                                                            |
| Chastain, Daniel B et al. 2019 [32]   | USA               | case series                       | 12/12                                                            |
| Dahesh, Samira et al. 2019 [33]       | USA               | case report                       | 1/1                                                              |
| Redell, Mark et al. 2019 [34]         | USA               | retrospective observational study | 32/440                                                           |
| Morrisette, Taylor et al. 2019 [35]   | USA               | retrospective cohort study        | 2/14                                                             |
| Van Hise, Nicholas W et al. 2020 [36] | USA               | retrospective observational study | 134/134                                                          |
| Brownell, Lauren E et al. 2020 [37]   | USA               | retrospective observational study | 73/73                                                            |
| Johnson, Jennifer A et al. 2015 [38]  | USA               | case report                       | 1/1                                                              |
| Terrero Salcedo A D et al. 2018 [39]  | USA               | case series                       | 2/5                                                              |

**Table S2.** PICOS search strategy adopted in the present systematic review.

| Search Strategy    | Details                                                                                                                              |
|--------------------|--------------------------------------------------------------------------------------------------------------------------------------|
| Search string      | (Oritavancin [MeSH Terms]) AND (off-label) OR (repeat* dose) OR (multiple dos*) OR (one week dose)                                   |
| Inclusion criteria | P (patients/population): outpatients and hospitalized patient                                                                        |
|                    | I (intervention/exposure): Subjects receiving multiple doses of oritovancin (off-label use)                                          |
|                    | C (comparisons/comparators): single dose                                                                                             |
|                    | O (outcome): cure                                                                                                                    |
|                    | S (study design): prospective or retrospective studies, editorial, commentaries, expert opinions, letters to editor, review articles |
| Databases          | PubMed/MEDLINE, Scopus                                                                                                               |
| Exclusion criteria | Experimental studies investigating in vitro or animal model.<br>Study design: articles with insufficient details                     |
| Time filter        | None (from inception)                                                                                                                |
| Language filter    | None (any language)                                                                                                                  |
